# Supplementary material for: Jet-Induced Rainfall Seasonality and C4 Expansion over East Asia
Source: Research Square preprint supplement (doi:10.21203/rs.3.rs-8290760/v1), 2026-01-08
Supplement: Supplementary file 1 [file cb4183786e56c2323c308768.docx]

**Supporting Information for**

Jet-Induced Rainfall Seasonality and C4 Expansion over East Asia

Jiawei Da1,2*†, Chijun Sun3, Lily Serach1, Timothy Gallagher4, Huayu Lu5, Katharine Huntington6, Ran Feng7, Hanzhi Zhang5, Hanlin Wang8, Shunchuan Ji9, Zachary Sharp10, Junfeng Ji2, Daniel Breecker1

Jiawei Da

Email: jiawei@psu.edu

**This PDF file includes:**

Figures S1 to S6

Figures


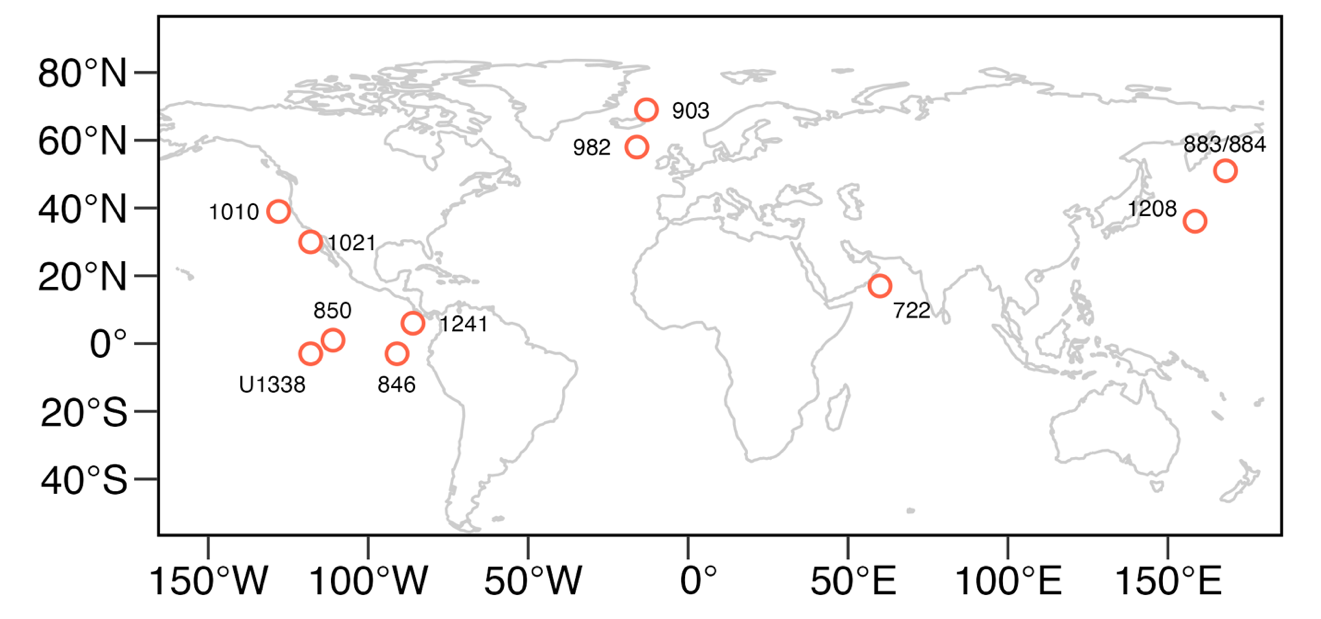


Fig. S1. The locations of Ocean Drilling Program (ODP) sites used in this study (1). The red circles and blue boxes show sites for the Miocene-Pliocene and the Pleistocene sea surface temperature records, respectively.


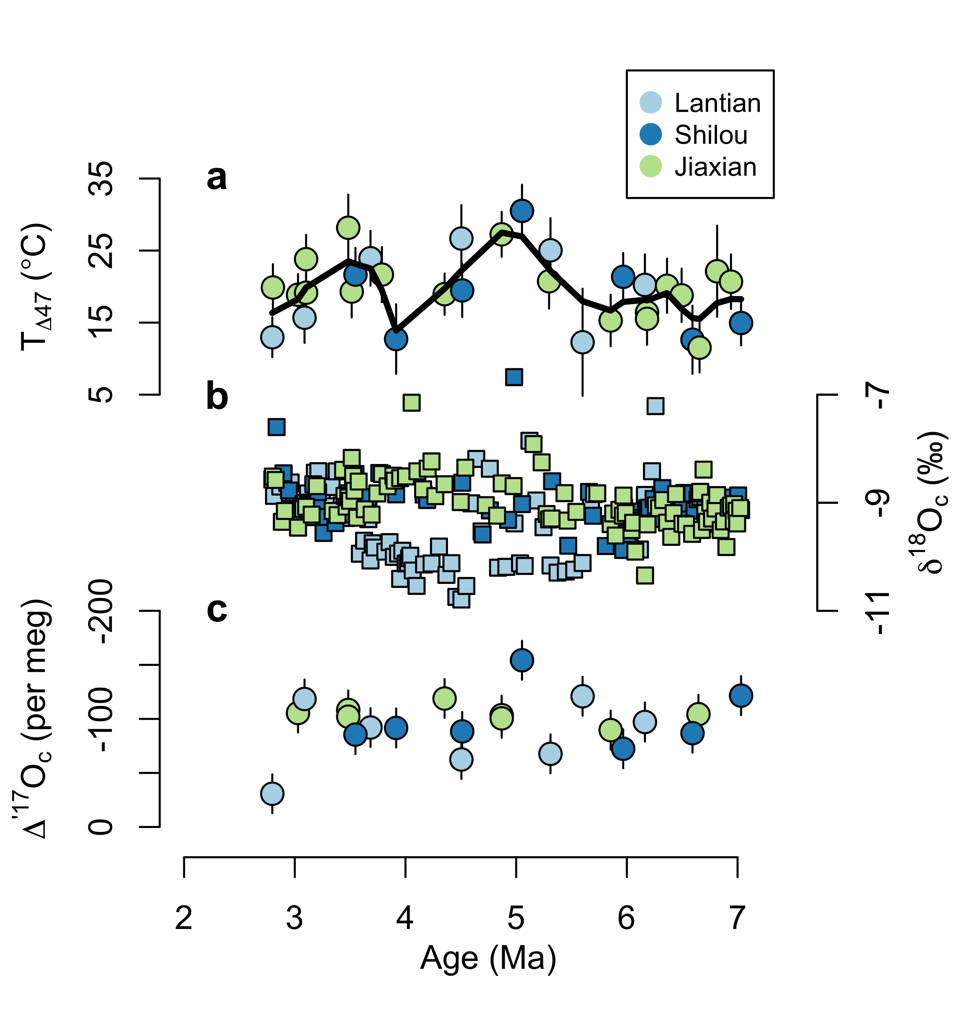


Fig. S2. Measurements from calcite nodules. (a) Clumped isotope temperature (TΔ47). (b) The stable oxygen isotopic compositions (δ18Oc). (b) The Δ′17O values (Δ′17Oc). Error bars denote standard errors from replicate analyses. Note the reversed scale for Δ′17Oc. The black lines in panels a are the LOESS lines (span = 0.3).


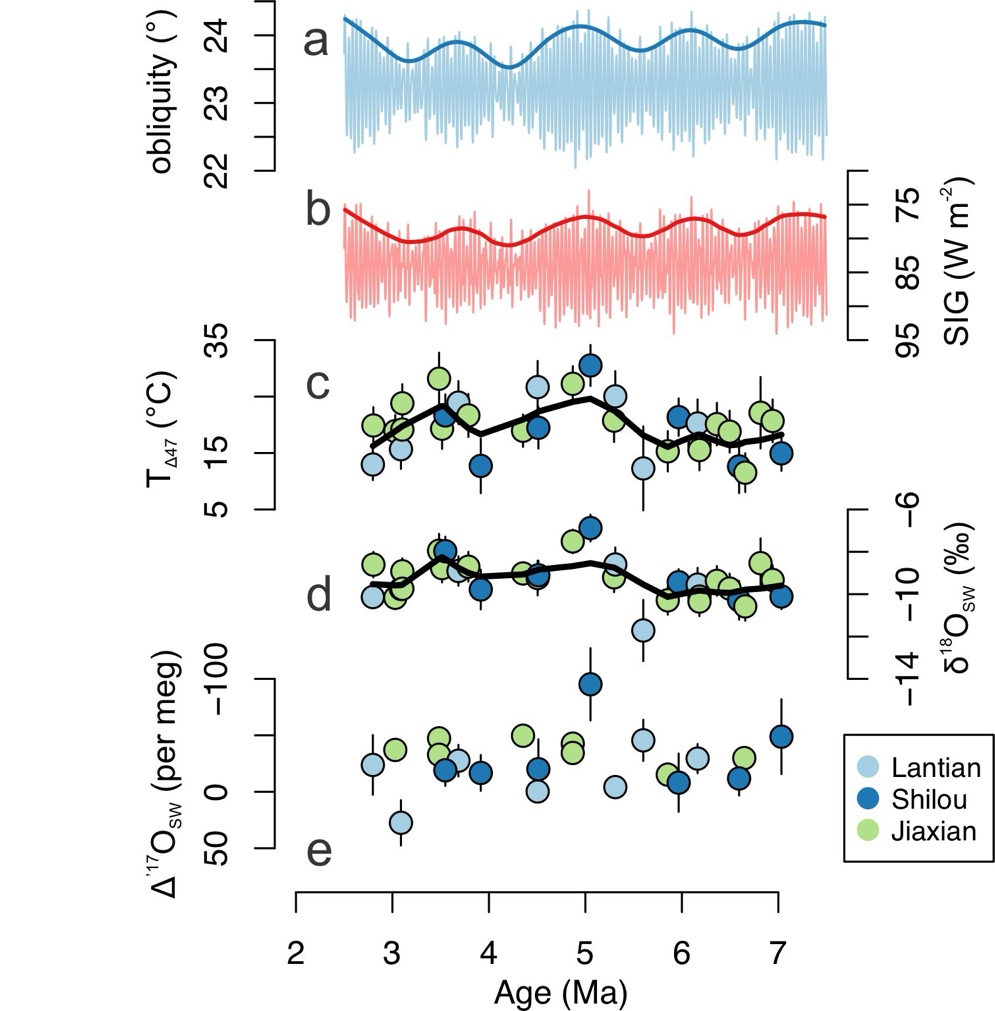


**Fig. S3. Comparison of nodule-derived records with obliquity signal.** (a) Obliquity signal in La2004 astronomical solution along with its filtered ∼1.2-Myr amplitude modulation. (b) 25° - 65°N summer insolation gradient (SIG) with its filtered ∼1.2-Myr amplitude modulation. (c) Clumped isotope temperature (TΔ47). Error bars denote standard errors from replicate analyses. (d) Reconstructed δ18O of soil waters (δ18Osw) using paired δ18Oc-TΔ47 measurements. Error bars are propagated from uncertainties in δ18Oc and TΔ47 using Monte Carlo random sampling. (e) The Δ′17O of soil waters (Δ′17Osw) calculated from paired TΔ47-Δ′17Oc measurements. Note the reversed scale for SIG and Δ′17Osw. The black lines in panels c-d are the LOESS lines (span = 0.3).

**
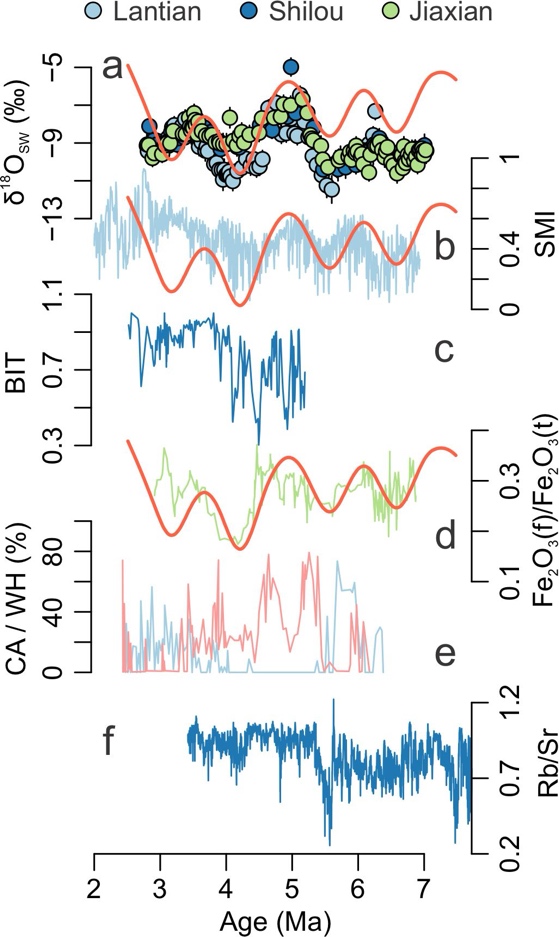
**

**Fig. S4. Proxy-derived records from the CLP.** (a) δ18Osw from this study. (b) Summer monsoon index based on soil magnetic susceptibility and carbonate content from Lingtai section14. (c) The brGDGT-based aridity indicators (BIT) from Shilou section (2). (d) The ratio of free iron to total iron content from Pianguan section (3). (e) Relative abundance of mollusk assemblages (red: warm-humid, blue: cold-dry) (4). (f) Bulk soil Rb/Sr ratio from Shilou section (5). Higher values in panels b-d and f were interpreted to indicate stronger monsoon and/or wetter climate. Red curves in panels a, b, and d show the ~1.2 Ma obliquity amplitude modulation.


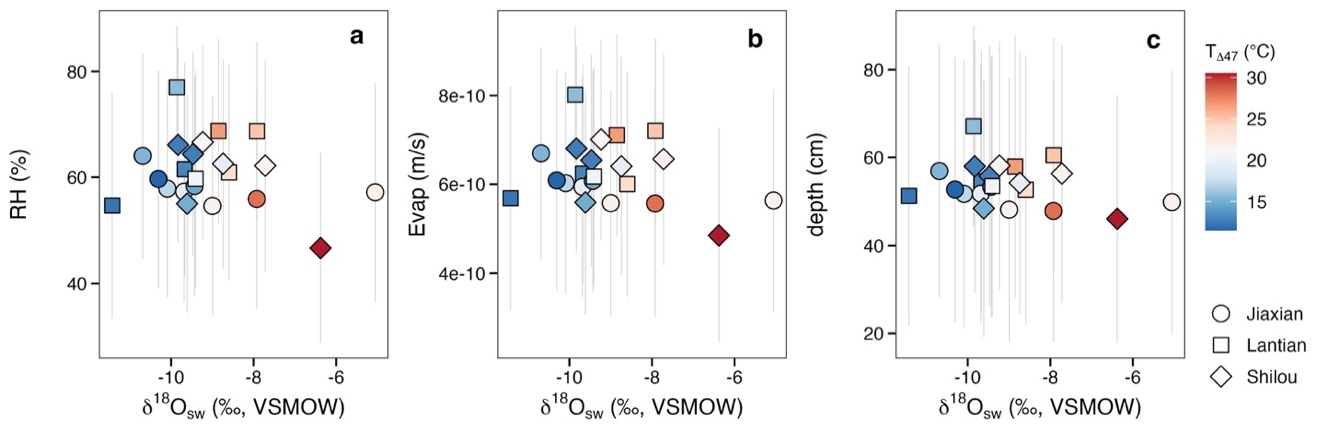


**Fig. S5. Posteriors from Bayesian inversion of the steady state model.** To quantitatively estimate environmental parameters that affect the oxygen isotope compositions of soil water (δ18Osw and Δ′17Osw), we employed Bayesian inversion to a steady-state isotope model (6, 7), which accounts for liquid and vapor transport within a 1-D soil column under isothermal condition. Here, the prior range of input parameters, including air humidity (RH), the δ18O of rainfall, carbonate formation depth, and evaporation rate were set to uniform distributions of 10-90%, -25 - -5‰, 0-100 cm, and 10-10 - 10-9 m/s, respectively, based on modern observations. Panels a-c are posterior estimates of RH and evaporation rate, and carbonate formation depth plotted against the reconstructed δ18Osw, respectively. Different sections and TΔ47 are shape- and color-coded, respectively. Error bars represent 1σ error resulting from 16th and 84th percentiles of the posterior distributions.


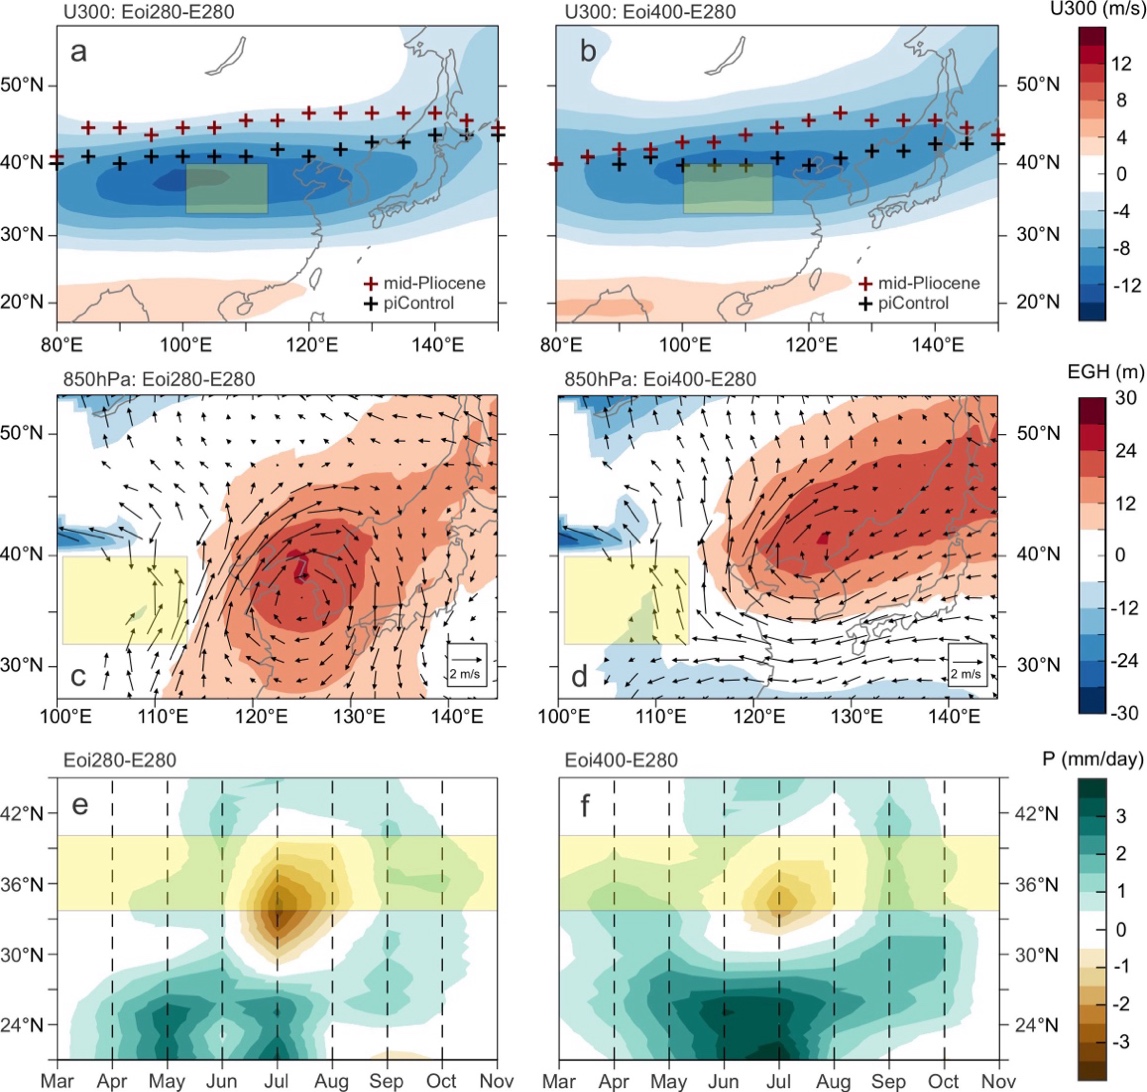


**Fig. S6. The westerly jet, western Pacific subtropical high, and East Asian monthly rainfall from model simulations.** (a-b) Differences in zonal winds at 300 hPa in July. The markers denote the axis of the westerly jet defined as the latitude with the maximum zonal wind speed over 10-50°N. (c-d) Differences in the eddy geopotential height (EGH, shading) and horizontal wind (vectors) at 850 hPa in July. (e-f) Monthly precipitation anomaly over 105-120°E. The left panels show the differences between Pliocene 280 ppm (Eoi280) and pre-industrial (E280) experiments, whereas the right panels show the differences between Pliocene 400 ppm (Eoi400) and E280 experiments. Yellow boxes highlight the CLP region.

**SI References**

1. T. D. Herbert, *et al.*, Late Miocene global cooling and the rise of modern ecosystems. *Nature Geoscience* **9** (2016).

2. Y. Zheng, *et al.*, Severe Drought Conditions in Northern East Asia During the Early Pliocene Caused by Weakened Pacific Meridional Temperature Gradient. *Geophysical Research Letters* **49**, e2022GL098813 (2022).

3. S. Yang, *et al.*, A strengthened East Asian Summer Monsoon during Pliocene warmth: Evidence from ‘red clay’ sediments at Pianguan, northern China. *Journal of Asian Earth Sciences* **155**, 124–133 (2018).

4. F. Li, D.-D. Rousseau, N. Wu, Q. Hao, Y. Pei, Late Neogene evolution of the East Asian monsoon revealed by terrestrial mollusk record in Western Chinese Loess Plateau: From winter to summer dominated sub-regime. *Earth and Planetary Science Letters* **274**, 439–447 (2008).

5. H. Ao, *et al.*, Global warming-induced Asian hydrological climate transition across the Miocene–Pliocene boundary. *Nature Communications* **12**, 6935 (2021).

6. C. J. Barnes, G. B. Allison, The distribution of deuterium and 18O in dry soils: 1. Theory. *Journal of Hydrology* **60**, 141–156 (1983).

7. J. R. Kelson, *et al.*, Triple oxygen isotope compositions of globally distributed soil carbonates record widespread evaporation of soil waters. *Geochimica et Cosmochimica Acta* (2023). https://doi.org/10.1016/j.gca.2023.06.034.
